# Supplementary material for: Interventions for family involvement enhance end-of-life care for hospitalized patients: an integrative review
Source: PubMed Central journal article supplement — BMC Nurs. 2024 Dec 18;23:917. doi: 10.1186/s12912-024-02538-z (PMC11658320; doi:10.1186/s12912-024-02538-z), 2024-12-18
Supplement: 12912_2024_2538_MOESM1_ESM.pdf [file 12912_2024_2538_MOESM1_ESM.pdf]

**Supplementary Table 1. Search strategies according to each database**

| <b>CINAHL</b> |                                                                                                                                                                              |                           |
|---------------|------------------------------------------------------------------------------------------------------------------------------------------------------------------------------|---------------------------|
| <b>No.</b>    | <b>Search Terms</b>                                                                                                                                                          | <b>Number of articles</b> |
| S1            | AB(famil* OR caregiver* OR Carer* OR Relative* OR Kinship* OR Filiation* OR Spouse* OR partner* OR dependant*)                                                               | 615,107                   |
| S2            | TI(famil* OR caregiver* OR Carer* OR Relative* OR Kinship* OR Filiation* OR Spouse* OR partner* OR dependant*)                                                               | 169,185                   |
| S3            | S1 OR S2                                                                                                                                                                     | 690,092                   |
| S4            | AB(engagement* OR involvement* OR participation* OR 'take part' OR attend*)                                                                                                  | 278,403                   |
| S5            | TI(engagement* OR involvement* OR participation* OR 'take part' OR attend*)                                                                                                  | 60,444                    |
| S6            | S4 OR S5                                                                                                                                                                     | 307,215                   |
| S7            | AB(inpatient* OR in-hospital patient* OR in-patient* OR inpatient* OR hospitalised patient* OR hospitalized patient* OR in-hospital patient* OR Hospital* OR Ward* OR Unit*) | 1,007,518                 |
| S8            | TI(inpatient* OR in-hospital patient* OR in-patient* OR inpatient* OR hospitalised patient* OR hospitalized patient* OR in-hospital patient* OR Hospital* OR Ward* OR Unit*) | 492,560                   |
| S9            | S7 OR S8                                                                                                                                                                     | 1,279,766                 |
| S10           | AB(palliat* OR end-of-life OR "end of life" OR "terminally ill*" OR terminally-ill* OR dying OR hospice* OR dying OR death OR "terminal care")                               | 232,098                   |
| S11           | TI(palliat* OR end-of-life OR "end of life" OR "terminally ill*" OR terminally-ill* OR dying OR hospice* OR dying OR death OR "terminal care")                               | 99,648                    |
| S12           | S10 OR S11                                                                                                                                                                   | 286,588                   |
| S13           | S3 AND S6 AND S9 AND S12                                                                                                                                                     | 2,025                     |

| <b>Embase</b> |                                                                                                                                                                                                                                  |                           |
|---------------|----------------------------------------------------------------------------------------------------------------------------------------------------------------------------------------------------------------------------------|---------------------------|
| <b>No.</b>    | <b>Search Terms</b>                                                                                                                                                                                                              | <b>Number of articles</b> |
| 1             | family'/exp OR 'caregiver'/exp                                                                                                                                                                                                   | 736,628                   |
| 2             | carer*:ti,ab,kw OR relative*:ti,ab,kw OR kinship*:ti,ab,kw<br>OR filiation*:ti,ab,kw OR spouse*:ti,ab,kw OR partner*:ti,ab,kw                                                                                                    | 2,462,672                 |
| 3             | #1 OR #2                                                                                                                                                                                                                         | 3,090,092                 |
| 4             | participation'/exp OR 'engagement'/exp                                                                                                                                                                                           | 72,067                    |
| 5             | engagement*:ti,ab,kw OR involvement*:ti,ab,kw OR<br>participation*:ti,ab,kw OR 'take part':ti,ab,kw OR attend*:ti,ab,kw                                                                                                          | 1,472,112                 |
| 6             | #4 OR #5                                                                                                                                                                                                                         | 1,506,512                 |
| 7             | 'hospital patient'/exp                                                                                                                                                                                                           | 247,730                   |
| 8             | 'in patient*:ti,ab,kw OR inpatient*:ti,ab,kw OR 'hospitalised<br>patient*:ti,ab,kw OR 'hospitalized patient*:ti,ab,kw OR 'in-hospital<br>patient*:ti,ab,kw OR hospitalization*:ti,ab,kw OR 'ward*:ti,ab,kw<br>OR 'unit*:ti,ab,kw | 5,324,170                 |
| 9             | #12 OR #13                                                                                                                                                                                                                       | 5,354,113                 |
| 10            | dying'/exp OR 'terminal care'/exp OR 'palliative therapy'/exp                                                                                                                                                                    | 221,489                   |
| 11            | palliative therapy':ti,ab,kw OR end-of-life:ti,ab,kw OR 'end of<br>life':ti,ab,kw OR 'terminally ill*:ti,ab,kw OR death:ti,ab,kw OR<br>hospice*:ti,ab,kw                                                                         | 1,467,577                 |
| 12            | #4 OR #5                                                                                                                                                                                                                         | 1,615,019                 |
| 13            | #3 AND #6 AND #9 AND #12                                                                                                                                                                                                         | 3,772                     |
| 14            | #13 NOT 'conference abstract'/it                                                                                                                                                                                                 | 1,912                     |

| <b>Pubmed</b> |                                                                                                                                                    |                           |
|---------------|----------------------------------------------------------------------------------------------------------------------------------------------------|---------------------------|
| <b>No.</b>    | <b>Search Terms</b>                                                                                                                                | <b>Number of articles</b> |
| 1             | Family [40] OR caregivers [40]                                                                                                                     | 415,524                   |
| 2             | Carer*[TIAB] OR Relative*[TIAB] OR Kinship*[TIAB] OR Filiation*[TIAB] OR Spouse*[TIAB] OR Partner*[TIAB] OR Wife[TIAB] OR Husband[TIAB] OR Parent* | 2,528,805                 |
| 3             | #1 OR #2                                                                                                                                           | 2,735,273                 |
| 4             | Engagement*[TIAB] OR involvement*[TIAB] OR participation*[TIAB] OR 'take part'[TIAB] OR attend*[TIAB]                                              | 1,052,471                 |
| 5             | Inpatients [40] OR Hospitals [40]                                                                                                                  | 352,150                   |
| 6             | Hospital*[TIAB] OR "In-hospital*"[TIAB] OR "In-patient*"[TIAB] OR Inpatient*[TIAB] OR Ward*[TIAB] OR Unit*[TIAB]                                   | 4,635,661                 |
| 7             | #5 OR #6                                                                                                                                           | 4,728,518                 |
| 8             | Death [40] OR "Terminal Care" [40] OR "Hospice Care" [40] OR "Palliative Care" [40]                                                                | 274,101                   |
| 9             | Palliat*[TIAB] OR End-of-life[TIAB] OR "End of life"[TIAB] OR "Terminally ill"[TIAB] OR Dying[TIAB] OR Hospice*[TIAB]                              | 162,165                   |
| 10            | #8 OR #9                                                                                                                                           | 365,921                   |
| 11            | #3 AND #4 AND #7 AND #10                                                                                                                           | 1,446                     |

| <b>Web of Science</b> |                                                                                                                                                 |                           |
|-----------------------|-------------------------------------------------------------------------------------------------------------------------------------------------|---------------------------|
| <b>No.</b>            | <b>Search Terms</b>                                                                                                                             | <b>Number of articles</b> |
| 1                     | AB=(famil* OR caregiver* OR Carer* OR Relative* OR Kinship* OR Filiation* OR Spouse* OR partner* OR dependant*)                                 | 4,977,993                 |
| 2                     | AK=(famil* OR caregiver* OR Carer* OR Relative* OR Kinship* OR Filiation* OR Spouse* OR partner* OR dependant*)                                 | 268,619                   |
| 3                     | TI=(famil* OR caregiver* OR Carer* OR Relative* OR Kinship* OR Filiation* OR Spouse* OR partner* OR dependant*)                                 | 73,545                    |
| 4                     | #1 OR #2 OR #3                                                                                                                                  | 5,385,359                 |
| 5                     | AB=(engagement* OR involvement* OR participation* OR 'take part' OR attend*)                                                                    | 1,495,606                 |
| 6                     | AK=(engagement* OR involvement* OR participation* OR 'take part' OR attend*)                                                                    | 110,734                   |
| 7                     | TI=(engagement* OR involvement* OR participation* OR 'take part' OR attend*)                                                                    | 289,391                   |
| 8                     | #5 OR #6 OR #7                                                                                                                                  | 1,678,814                 |
| 9                     | AB=(palliat* OR end-of-life OR "end of life" OR "terminally ill*" OR terminally-ill* OR dying OR hospice* OR dying OR death OR "terminal care") | 1,586,695                 |
| 10                    | AK=(palliat* OR end-of-life OR "end of life" OR "terminally ill*" OR terminally-ill* OR dying OR hospice* OR dying OR death OR "terminal care") | 200,883                   |
| 11                    | TI=(palliat* OR end-of-life OR "end of life" OR "terminally ill*" OR terminally-ill* OR dying OR hospice* OR dying OR death OR "terminal care") | 519,732                   |
| 12                    | #9 OR #10 OR #11                                                                                                                                | 1,902,070                 |

|    |                                                                                                                                                                  |           |
|----|------------------------------------------------------------------------------------------------------------------------------------------------------------------|-----------|
| 13 | AB=(inpatient* OR in-hospital patient* OR in-patient* OR inpatient* OR hospitalised patient* OR hospitalized patient* OR in-hospital patient* OR Unit* OR Ward*) | 3,792,362 |
| 14 | AK=(inpatient* OR in-hospital patient* OR in-patient* OR inpatient* OR hospitalised patient* OR hospitalized patient* OR in-hospital patient* OR Unit* OR Ward*) | 155,583   |
| 15 | TI=(inpatient* OR in-hospital patient* OR in-patient* OR inpatient* OR hospitalised patient* OR hospitalized patient* OR in-hospital patient* OR Unit* OR Ward*) | 1,583,000 |
| 16 | #13 OR #14 OR #15                                                                                                                                                | 4,851,747 |
| 17 | #4 AND #8 AND #12 AND #16                                                                                                                                        | 2,995     |
